# Supplementary material for: Eukaryotic initiation factor 6 regulates mechanical responses in endothelial cells
Source: PubMed Central journal article supplement (PMC8763864; doi:10.1083/jcb.202005213), 2022-01-13

### Paxillin

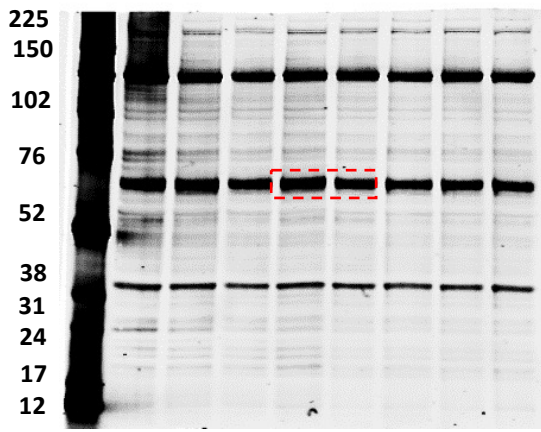

### FAK

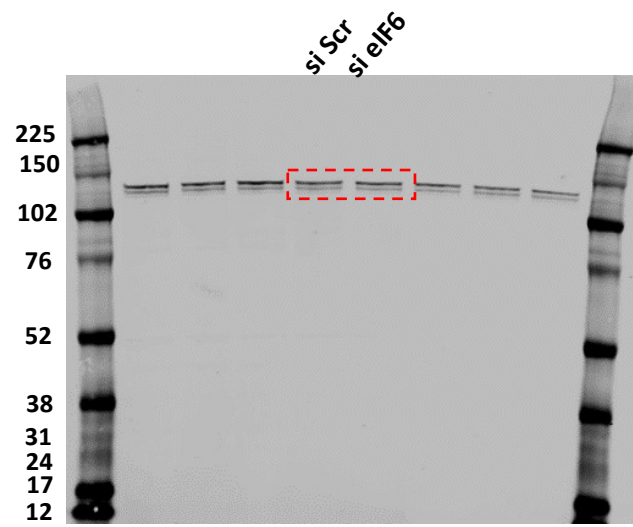

### Cofilin

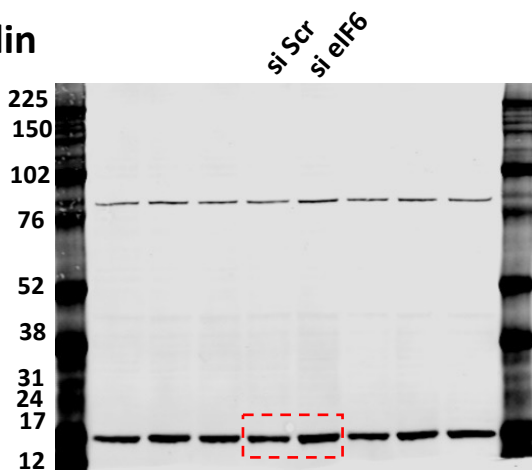

### ERK1/2

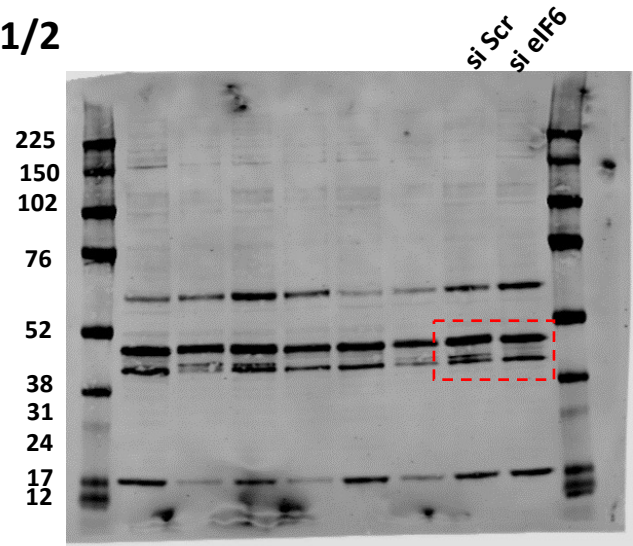

### Vinculin

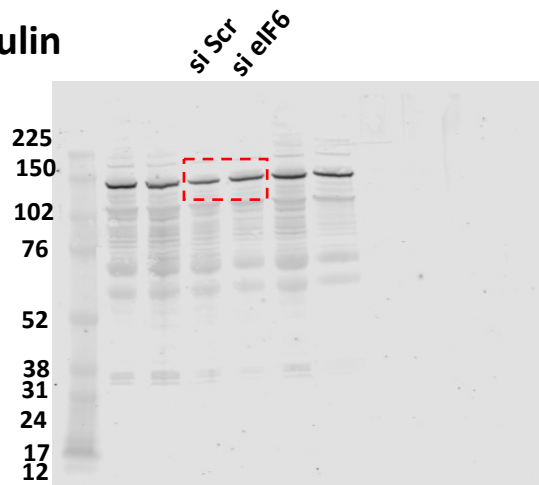

### MLC

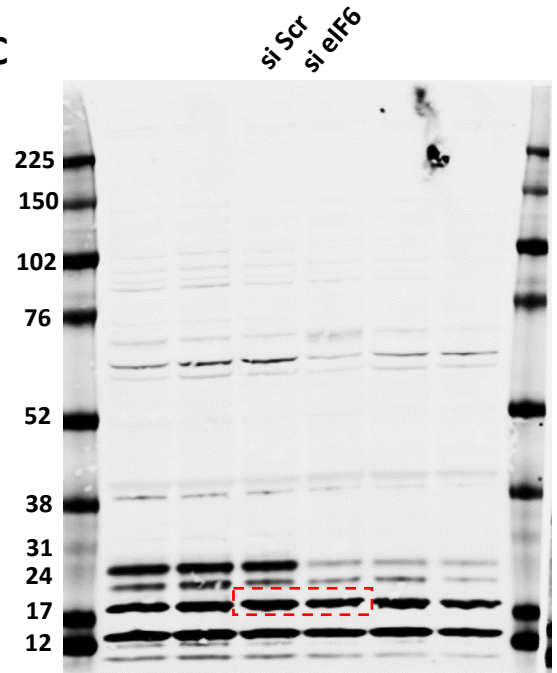

**Cas**

si Scr  
si elf6

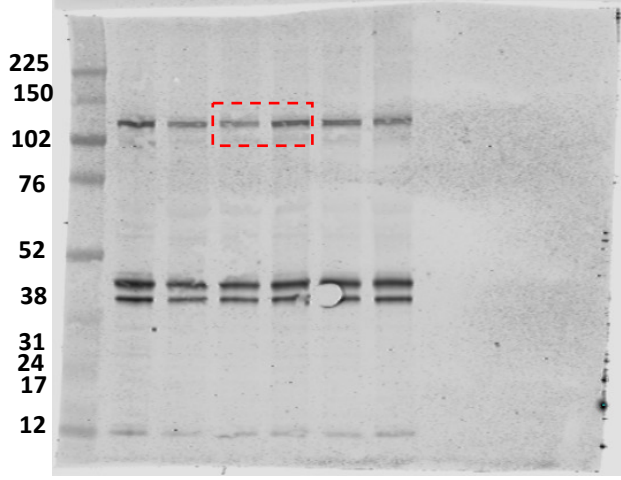

**Vimentin**

si Scr  
si elf6

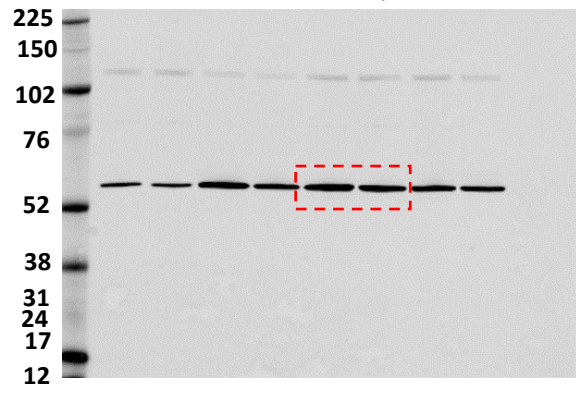

**Actin**

si Scr  
si elf6

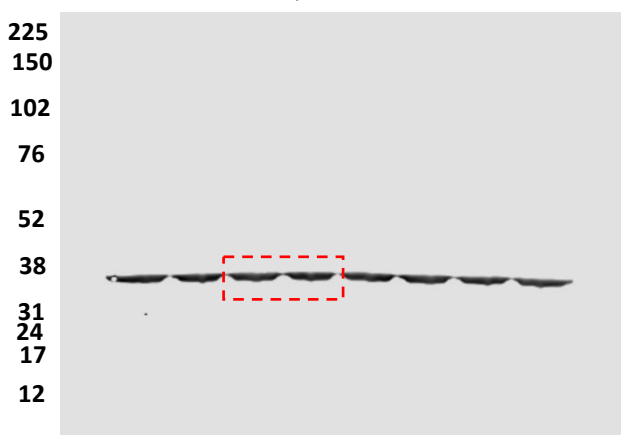

**GAPDH**

si Scr  
si elf6

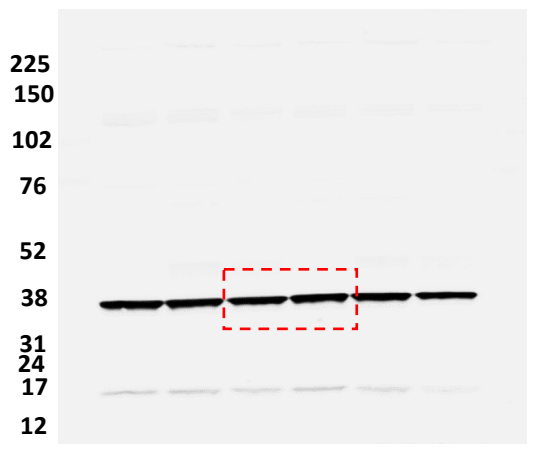

**Vinculin**

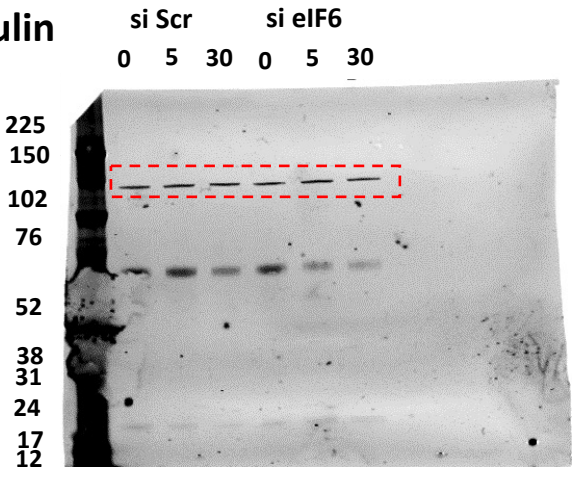

**FAK**

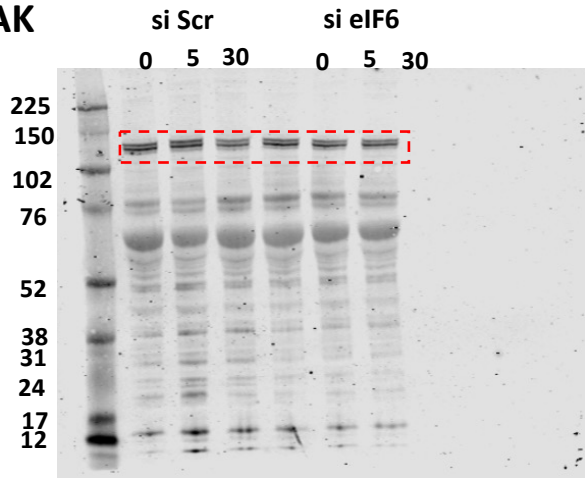

**Paxillin**

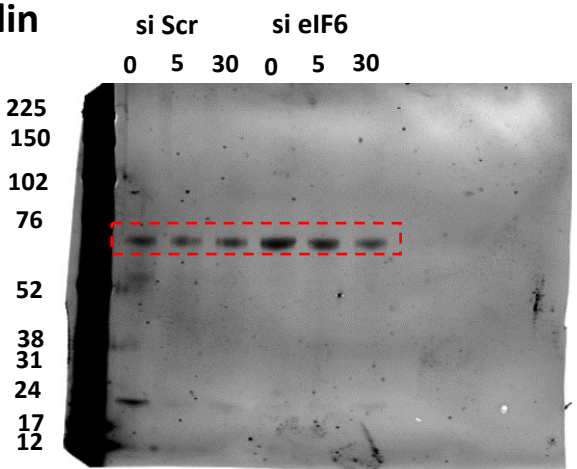

**ERK1/2**

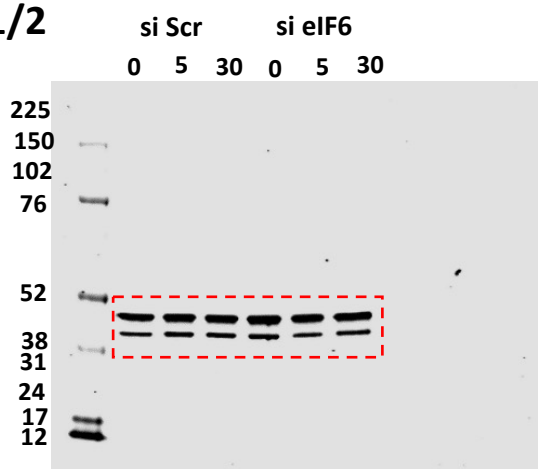

**GAPDH**

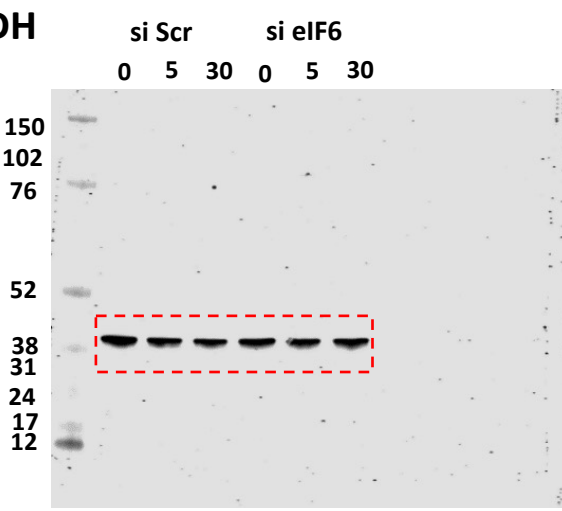

Supplement: JCB_202005213_SourceDataFS3.pdf [file JCB_202005213_SourceDataFS3.pdf]
