# Supplementary material for: Eukaryotic initiation factor 6 regulates mechanical responses in endothelial cells
Source: PubMed Central journal article supplement (PMC8763864; doi:10.1083/jcb.202005213), 2022-01-13
Supplement: JCB_202005213_SourceDataF1.pdf [file JCB_202005213_SourceDataF1.pdf]

**eIF6**

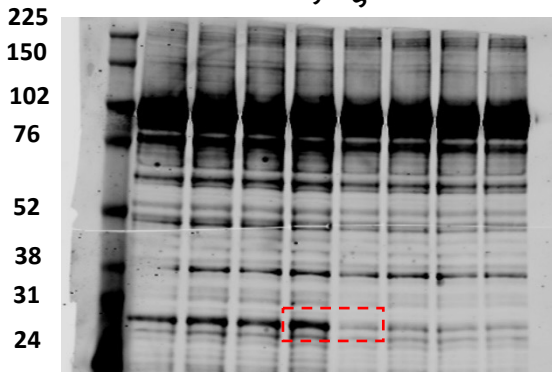

**GAPDH**

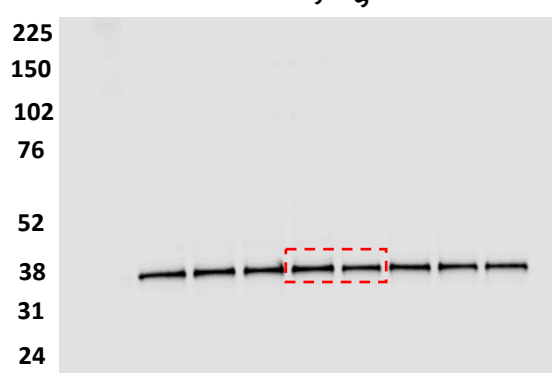

**RPL7a**

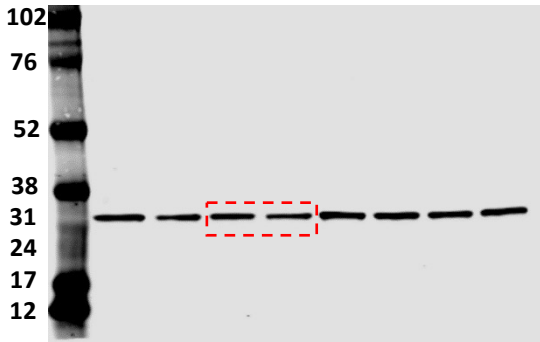

**RPL10**

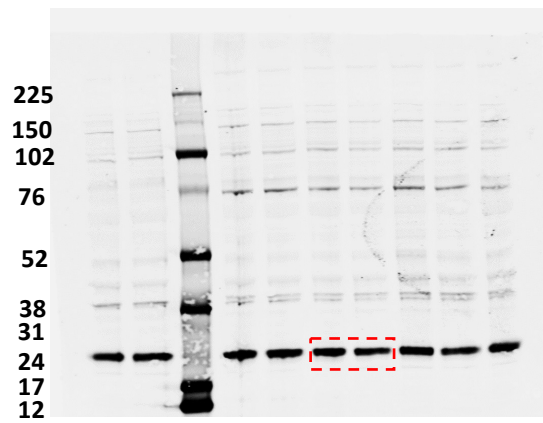

**RPL26**

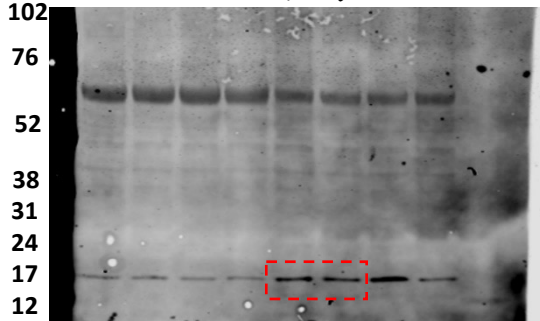

**RPL23**

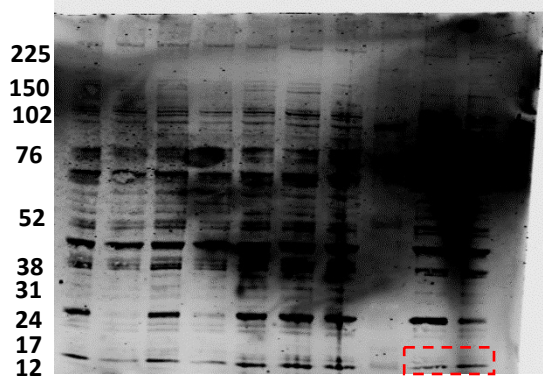

**GAPDH**

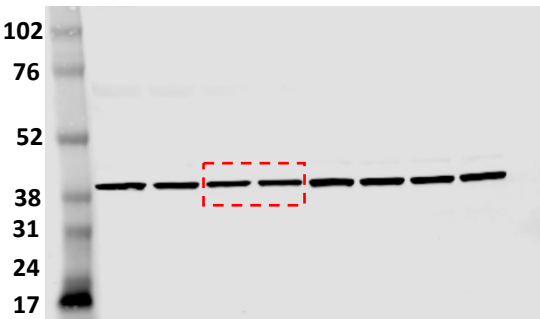

\* One GAPDH blot shown for representation
