# Supplementary material for: Eukaryotic initiation factor 6 regulates mechanical responses in endothelial cells
Source: PubMed Central journal article supplement (PMC8763864; doi:10.1083/jcb.202005213), 2022-01-13

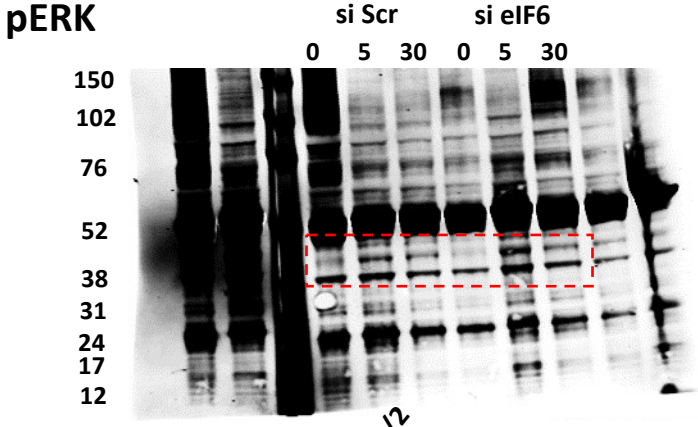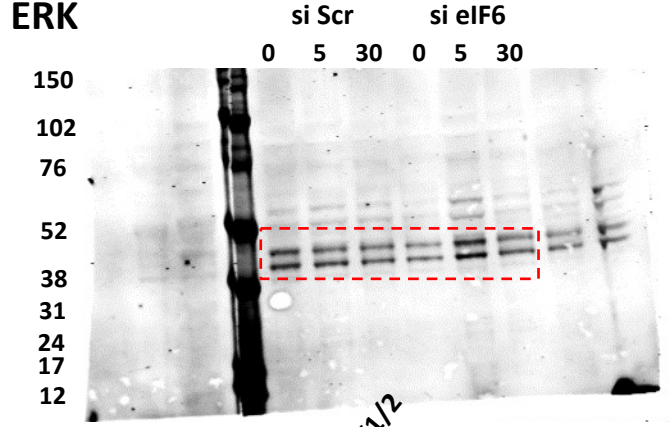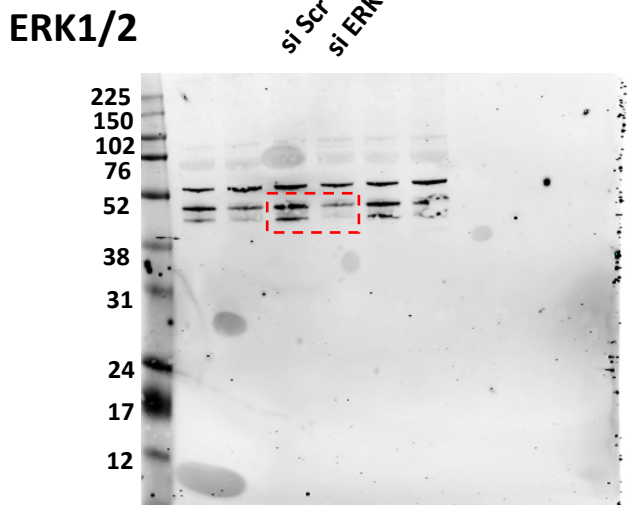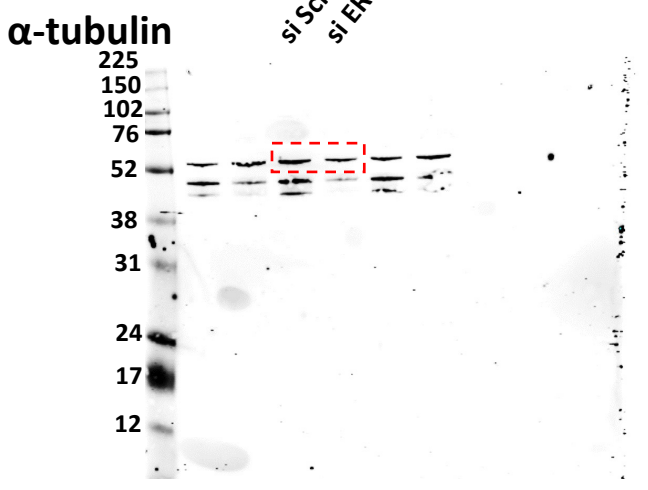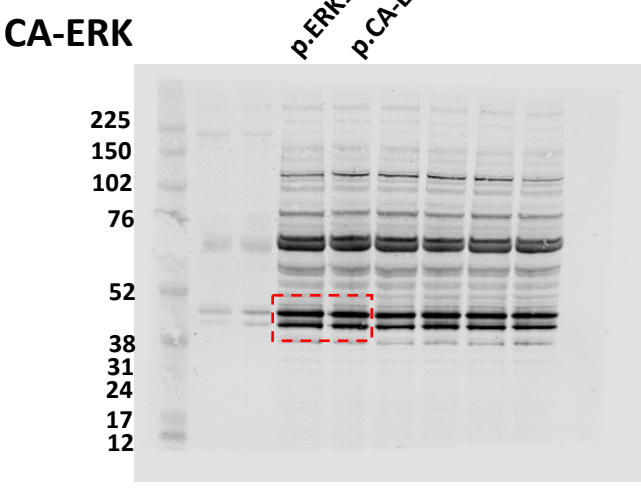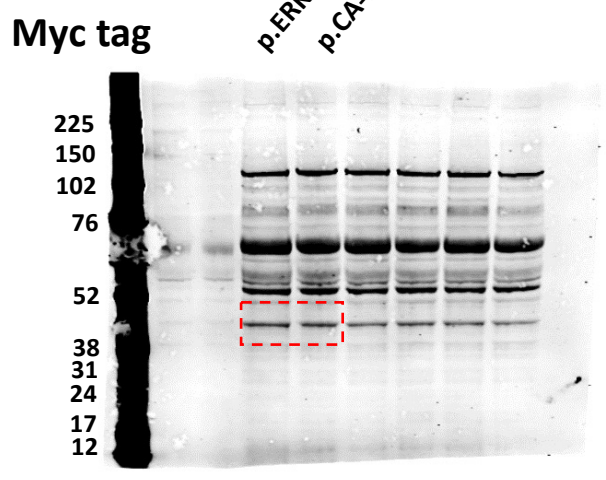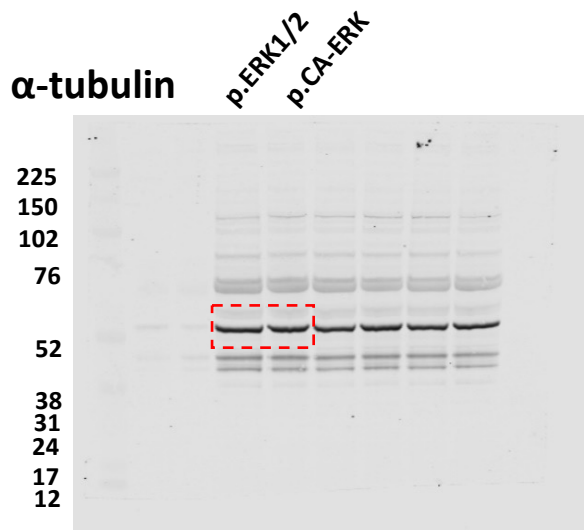

Supplement: JCB_202005213_SourceDataF5.pdf [file JCB_202005213_SourceDataF5.pdf]
