# Supplementary material for: Eukaryotic initiation factor 6 regulates mechanical responses in endothelial cells
Source: PubMed Central journal article supplement (PMC8763864; doi:10.1083/jcb.202005213), 2022-01-13

**IP:eIF6****RACK1**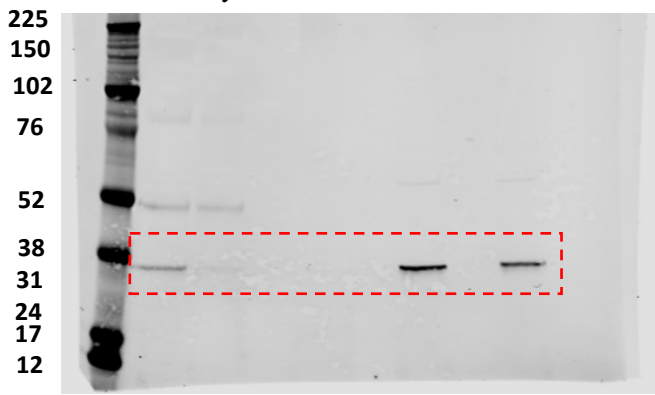**ERK1/2**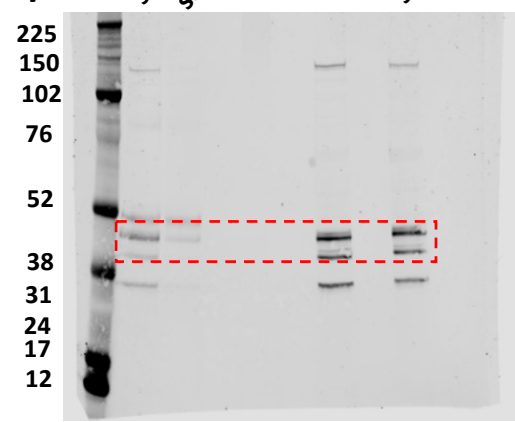**FAK**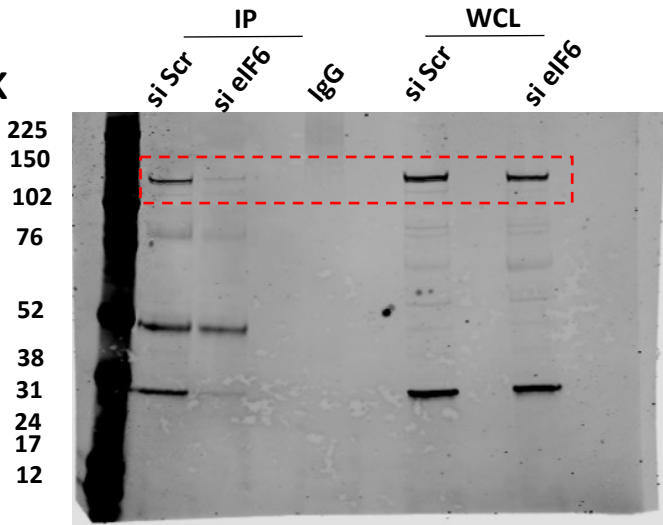**eIF6**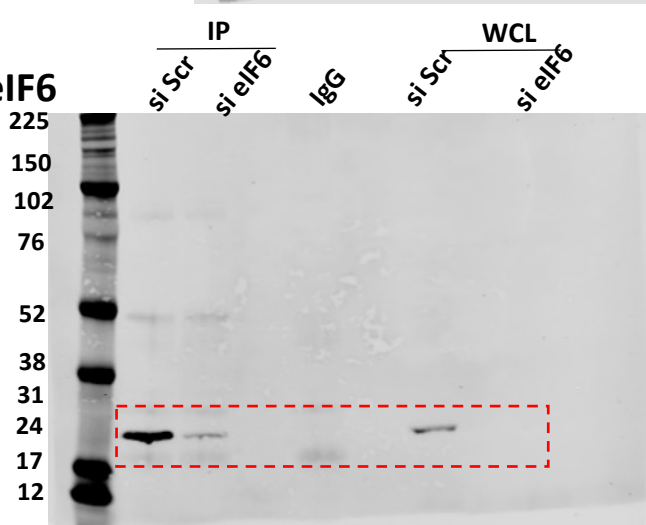

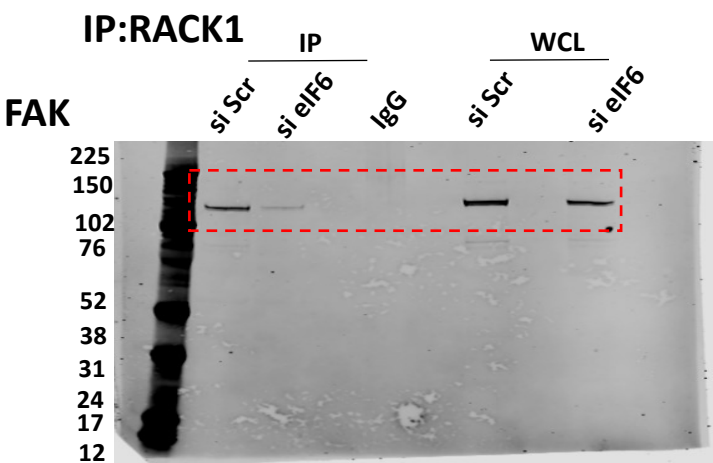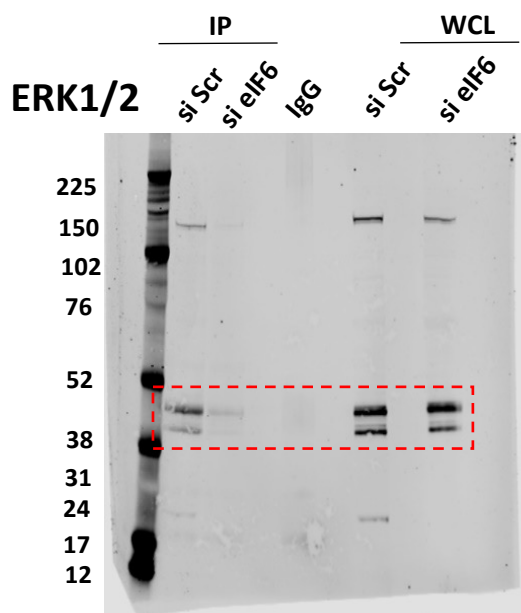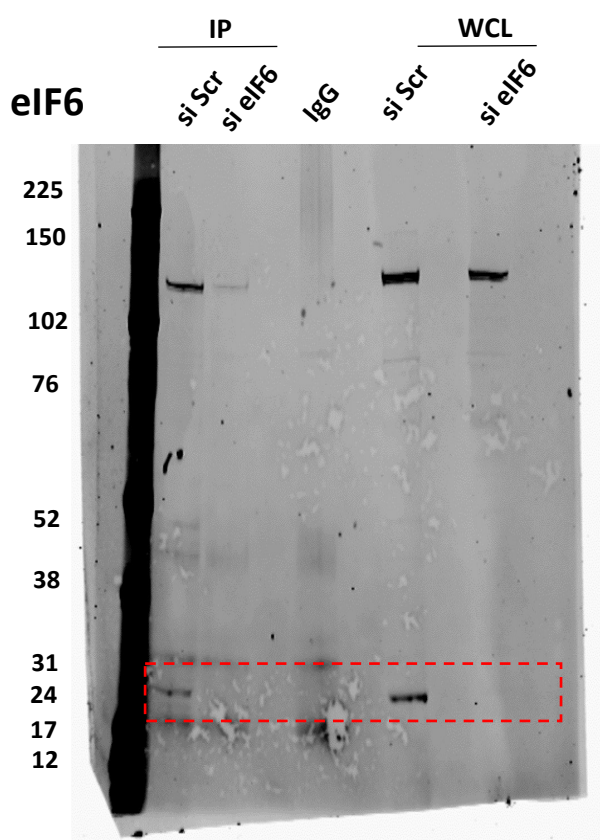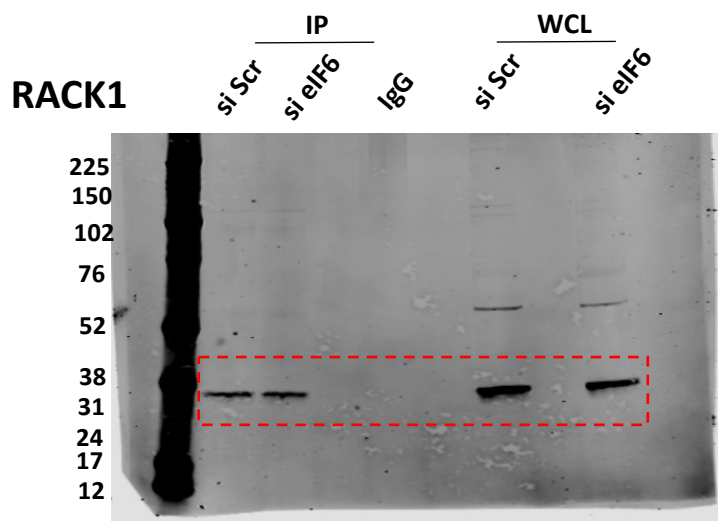

# IP:FAK

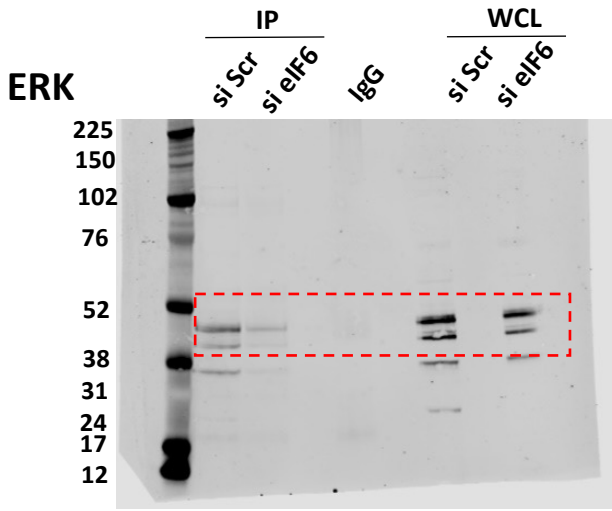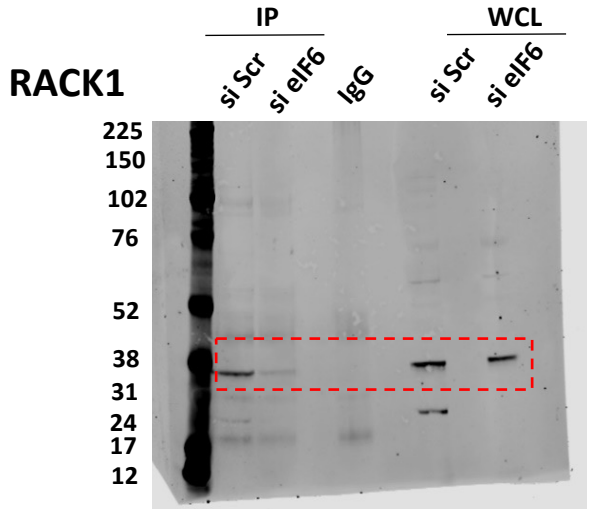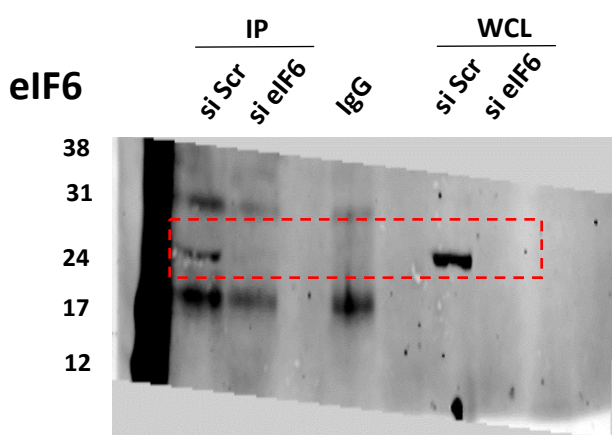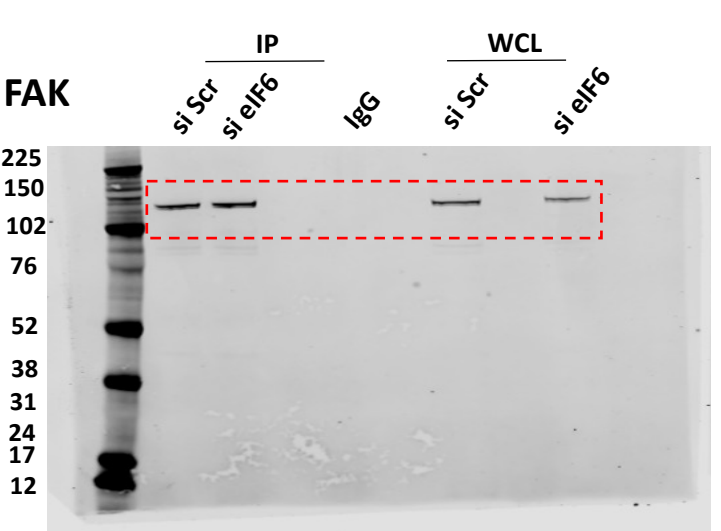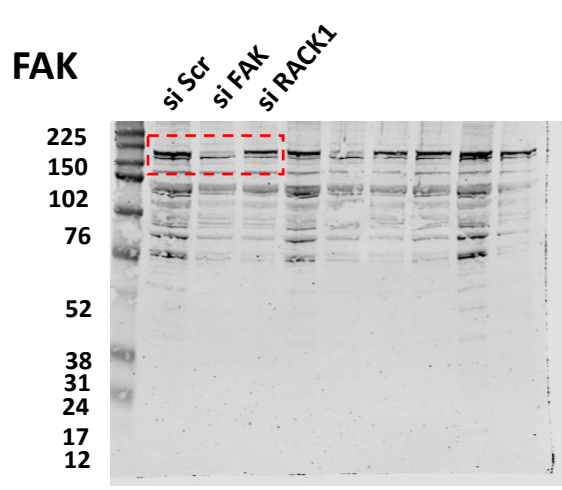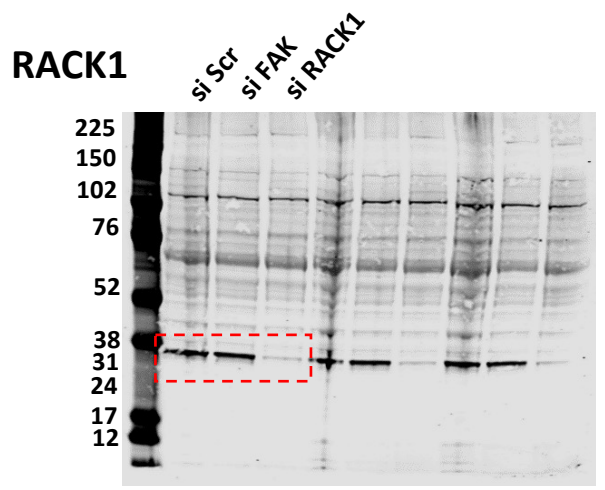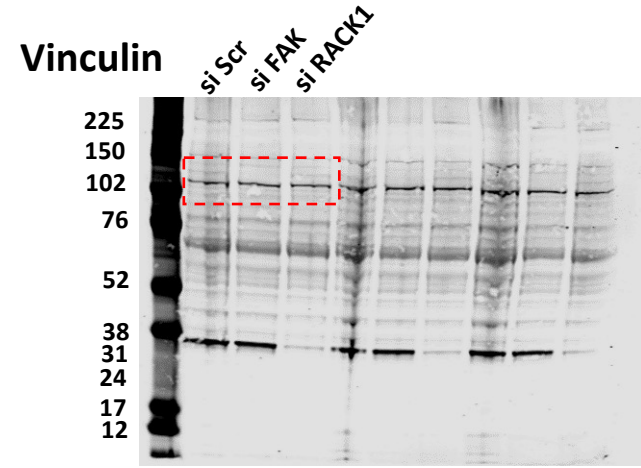

Supplement: JCB_202005213_SourceDataF6.pdf [file JCB_202005213_SourceDataF6.pdf]
