# Supplementary material for: Eukaryotic initiation factor 6 regulates mechanical responses in endothelial cells
Source: PubMed Central journal article supplement (PMC8763864; doi:10.1083/jcb.202005213), 2022-01-13

**RPL7**

si Scr  
si RPL7

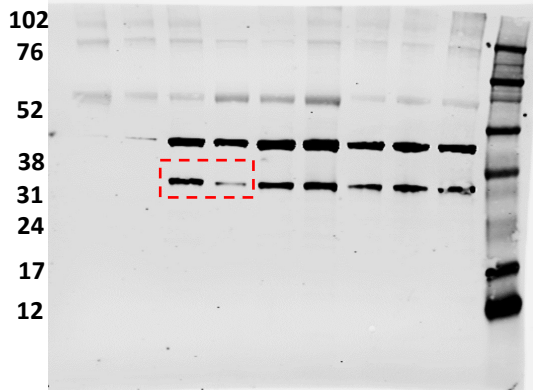

**Actin**

si Scr  
si RPL7

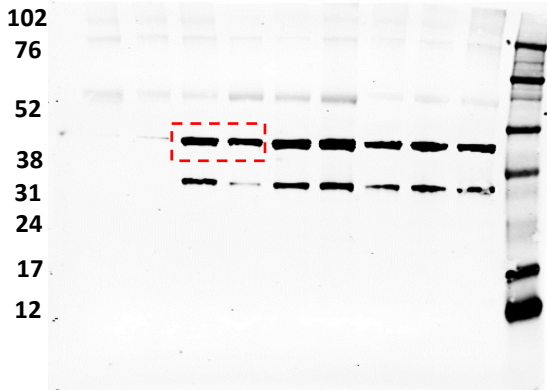

Supplement: JCB_202005213_SourceDataFS1.pdf [file JCB_202005213_SourceDataFS1.pdf]
