# Supplementary material for: Eukaryotic initiation factor 6 regulates mechanical responses in endothelial cells
Source: PubMed Central journal article supplement (PMC8763864; doi:10.1083/jcb.202005213), 2022-01-13

## eIF6 siRNA 1 + 2

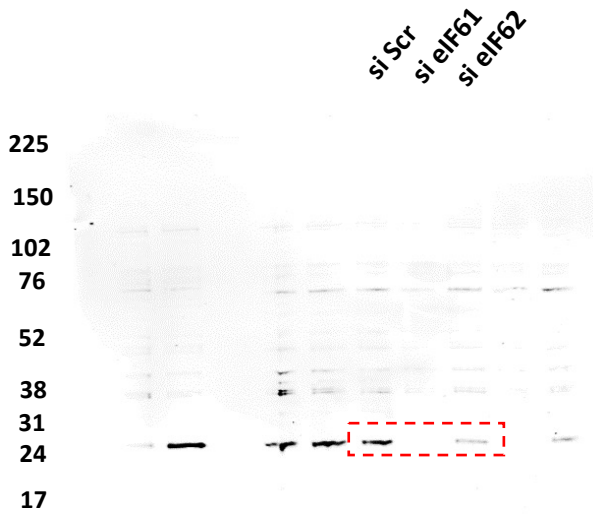

## Vinculin

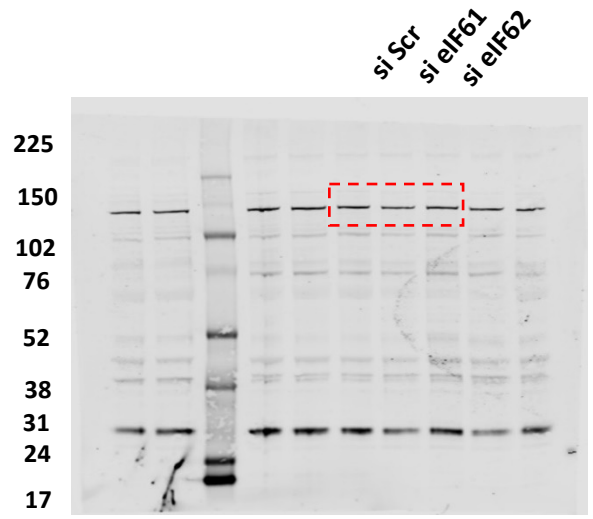

## Actin

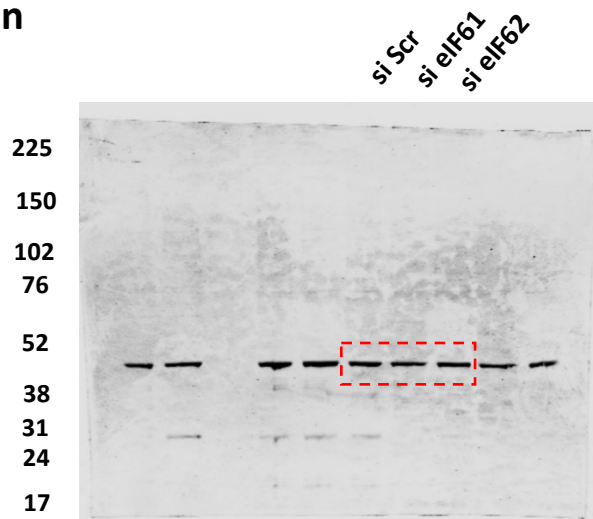

# eIF6 OE

## eIF6

Ad.LACZ  
Ad. eIF6

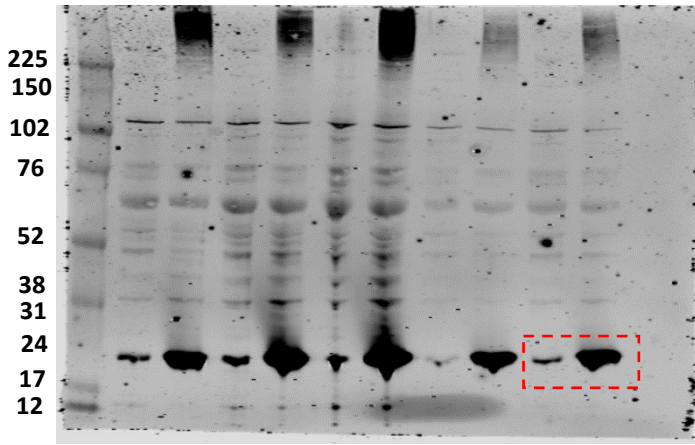

## Vinculin

Ad.LACZ  
Ad. eIF6

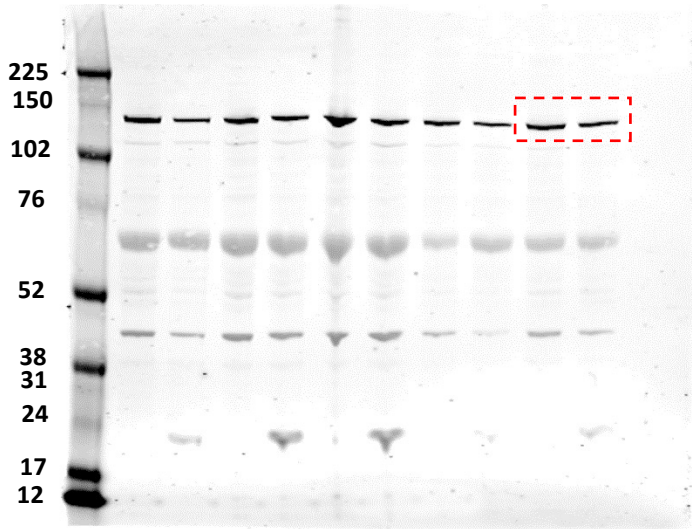

## Actin

Ad.LACZ  
Ad. eIF6

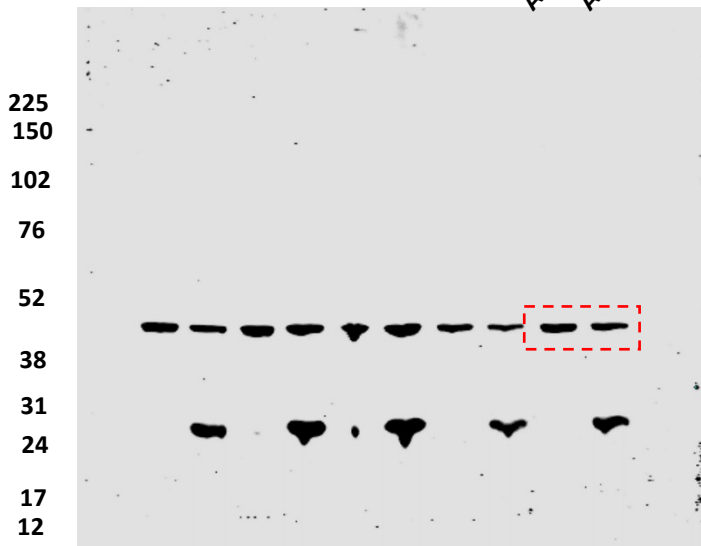

Supplement: JCB_202005213_SourceDataFS2.pdf [file JCB_202005213_SourceDataFS2.pdf]
